# Supplementary material for: Abandoning the Isochore Theory Can Help Explain Genome Compositional Organization in Fish
Source: MDPI journal article supplement (doi:10.3390/ijms241713167), 2023-08-24

Histogram of isochore families in bins of 1% GC - *Acipenser ruthenus*

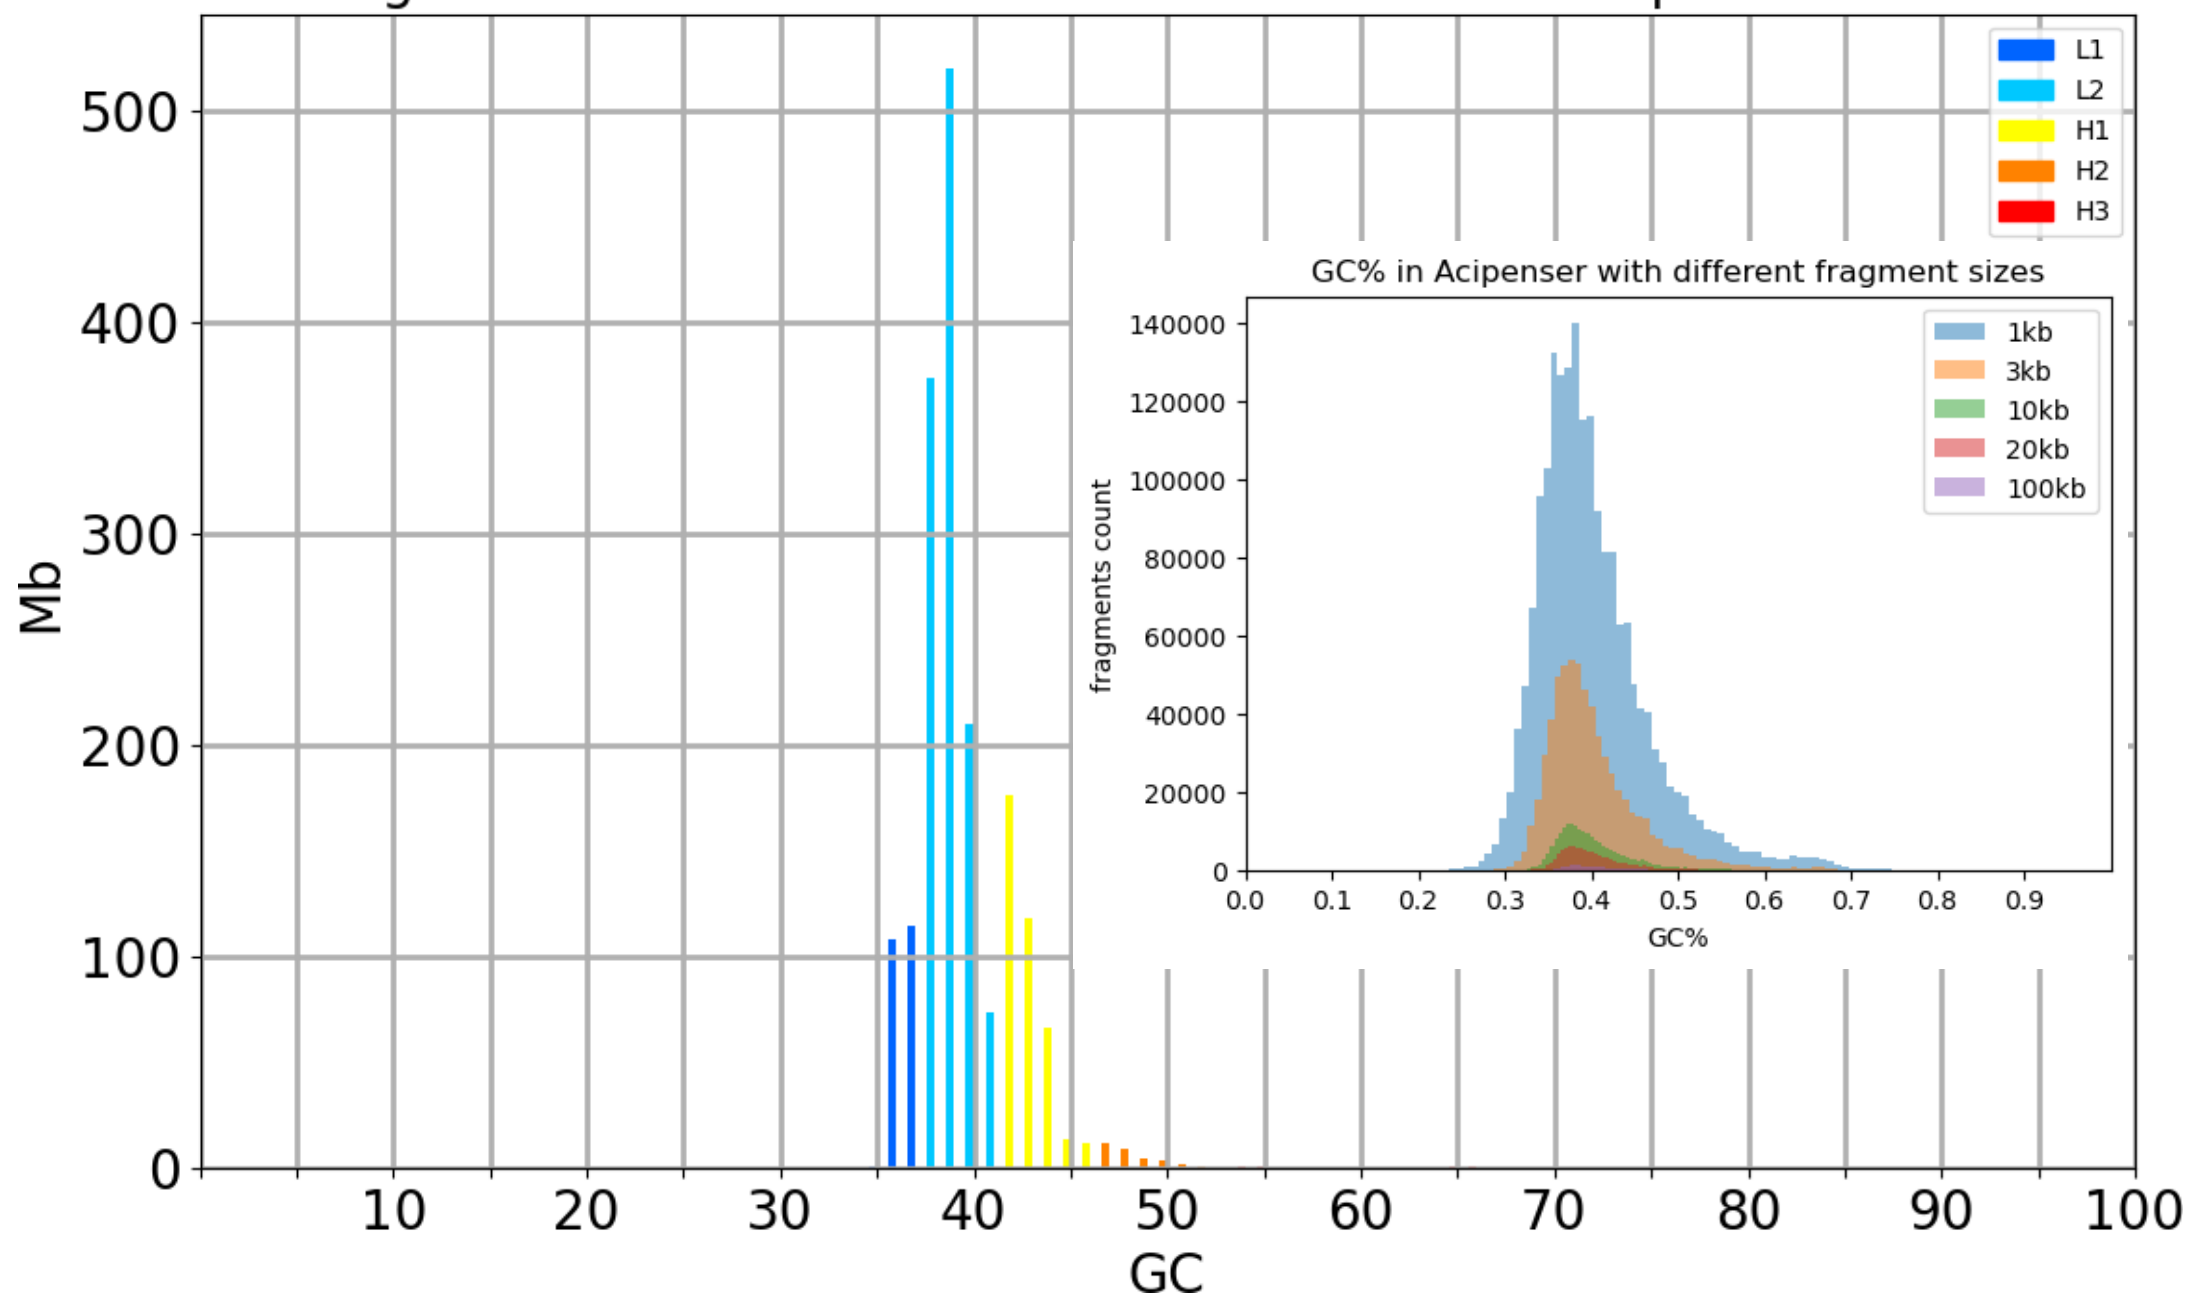

Histogram of isochore families in bins of 1% GC - *Amblyraja radiata*

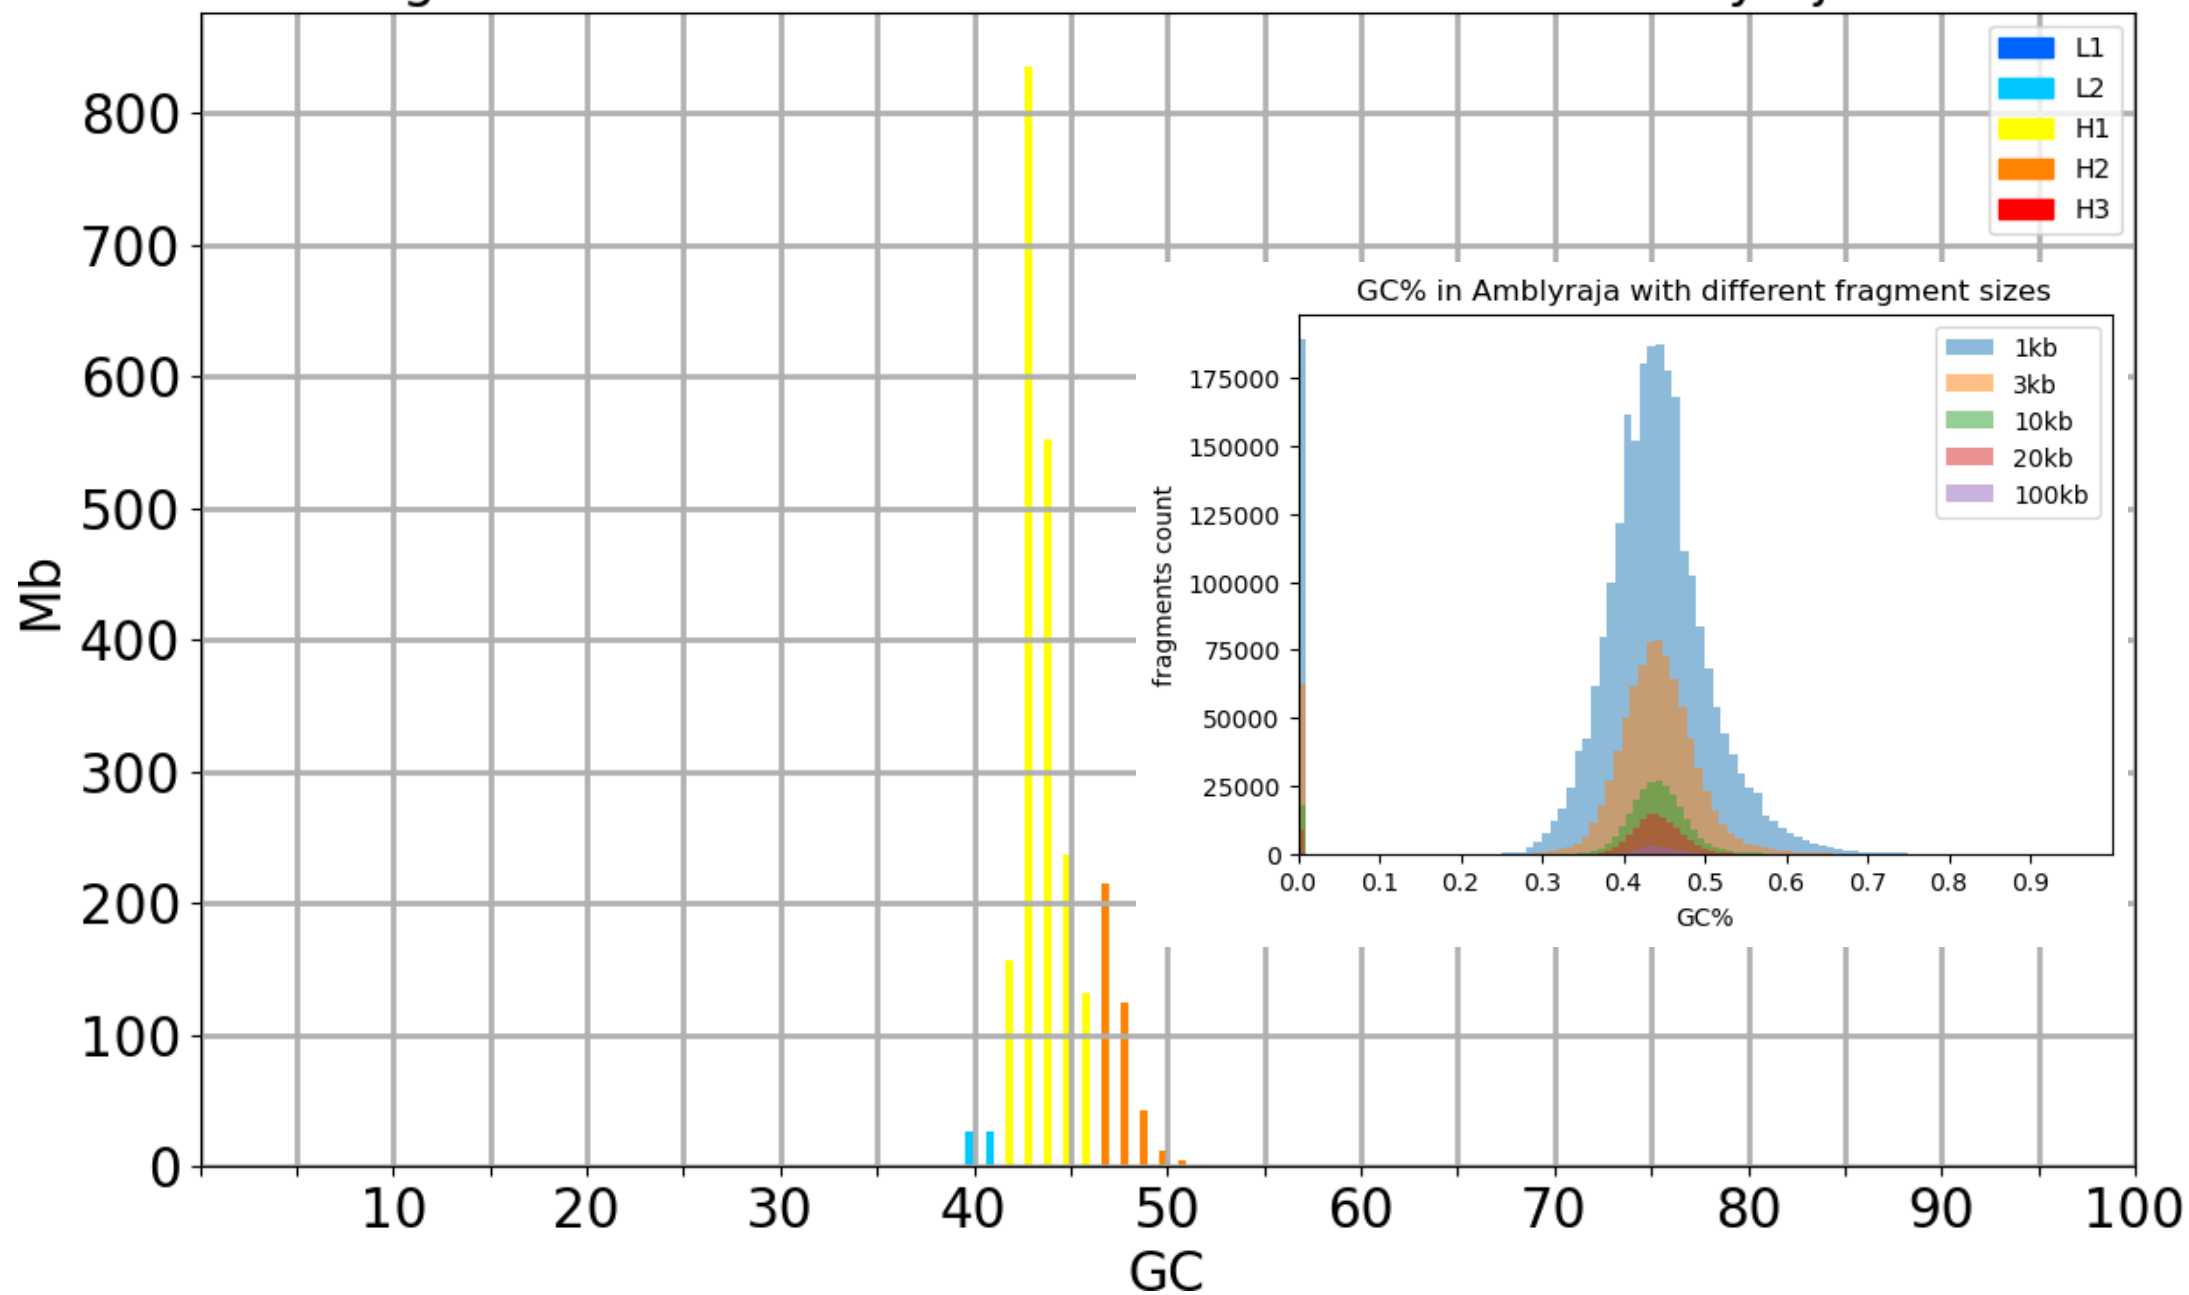

Histogram of isochore families in bins of 1% GC - *Amia calva*

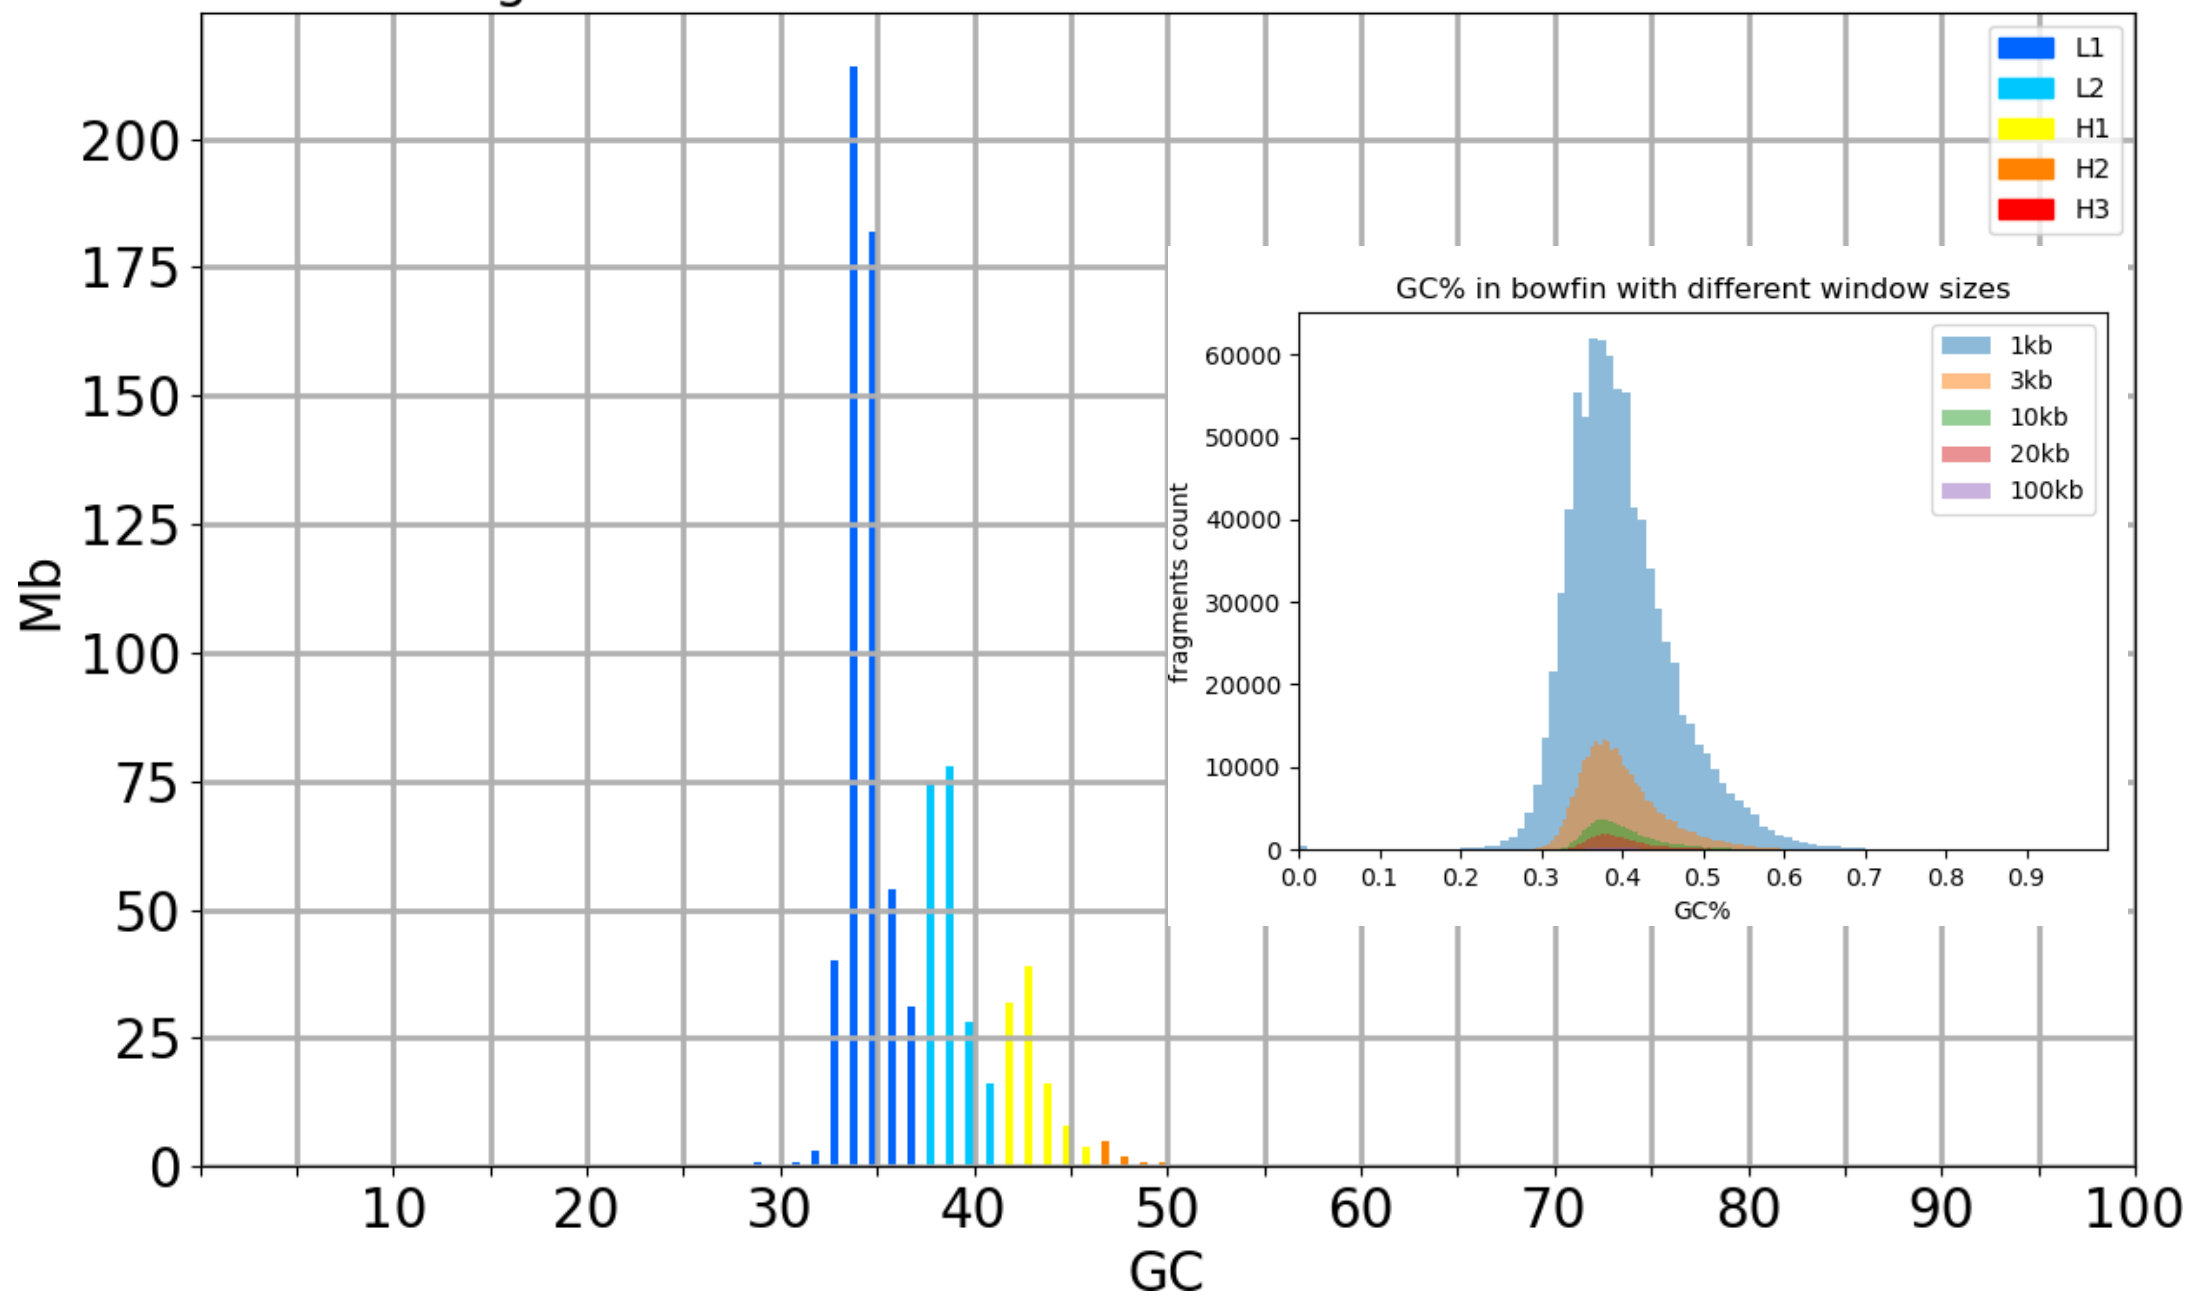

Histogram of isochore families in bins of 1% GC - *Anguilla anguilla*

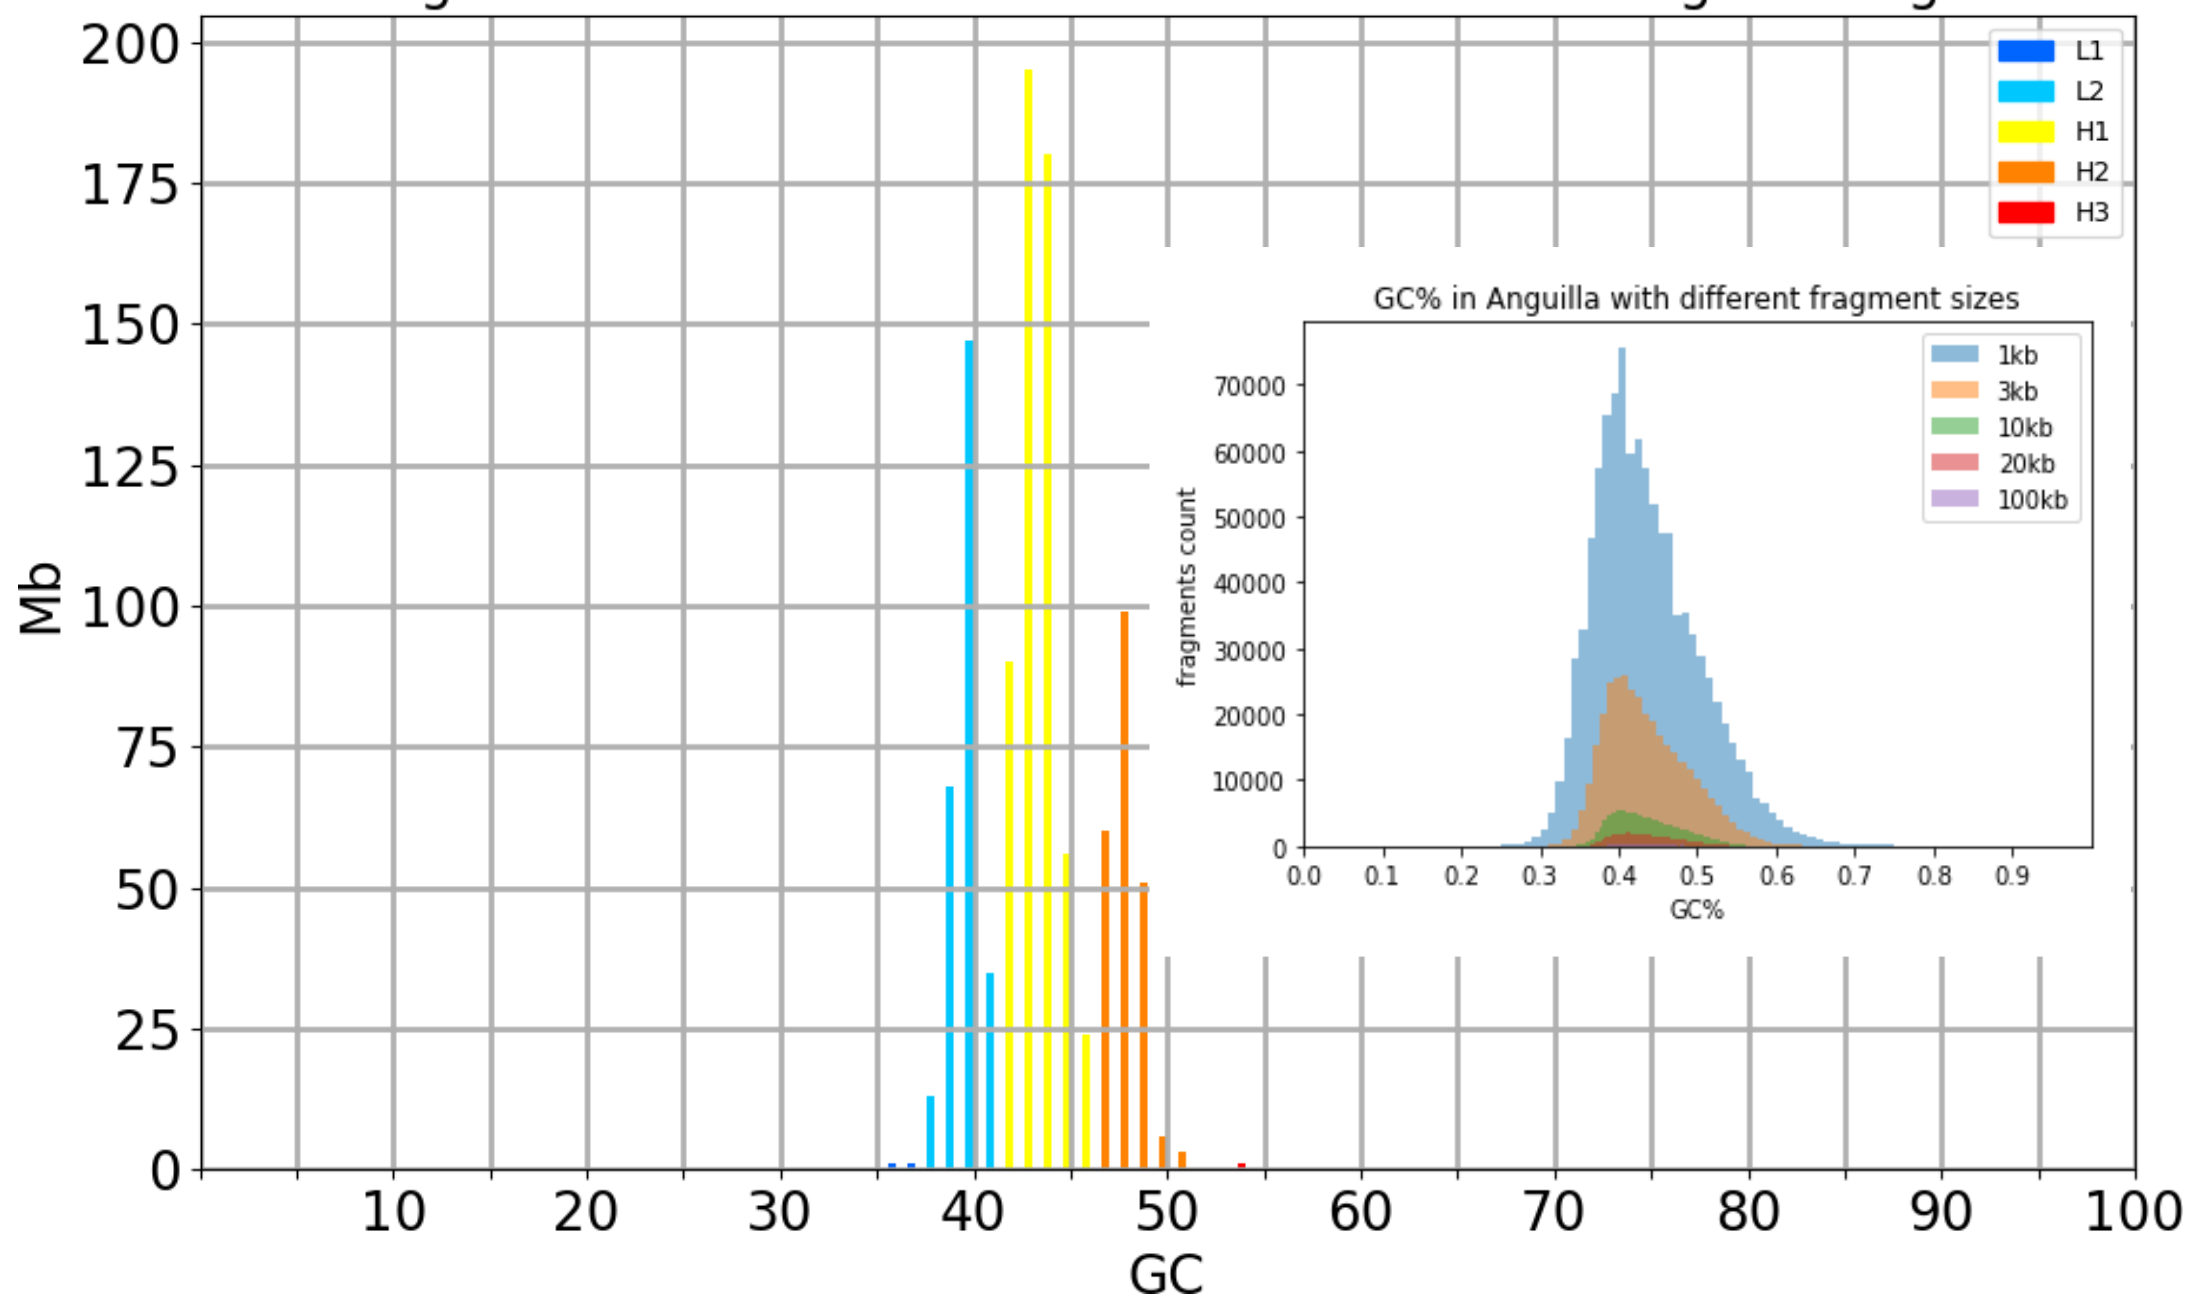

Histogram of isochore families in bins of 1% GC - *Atractosteus spatula*

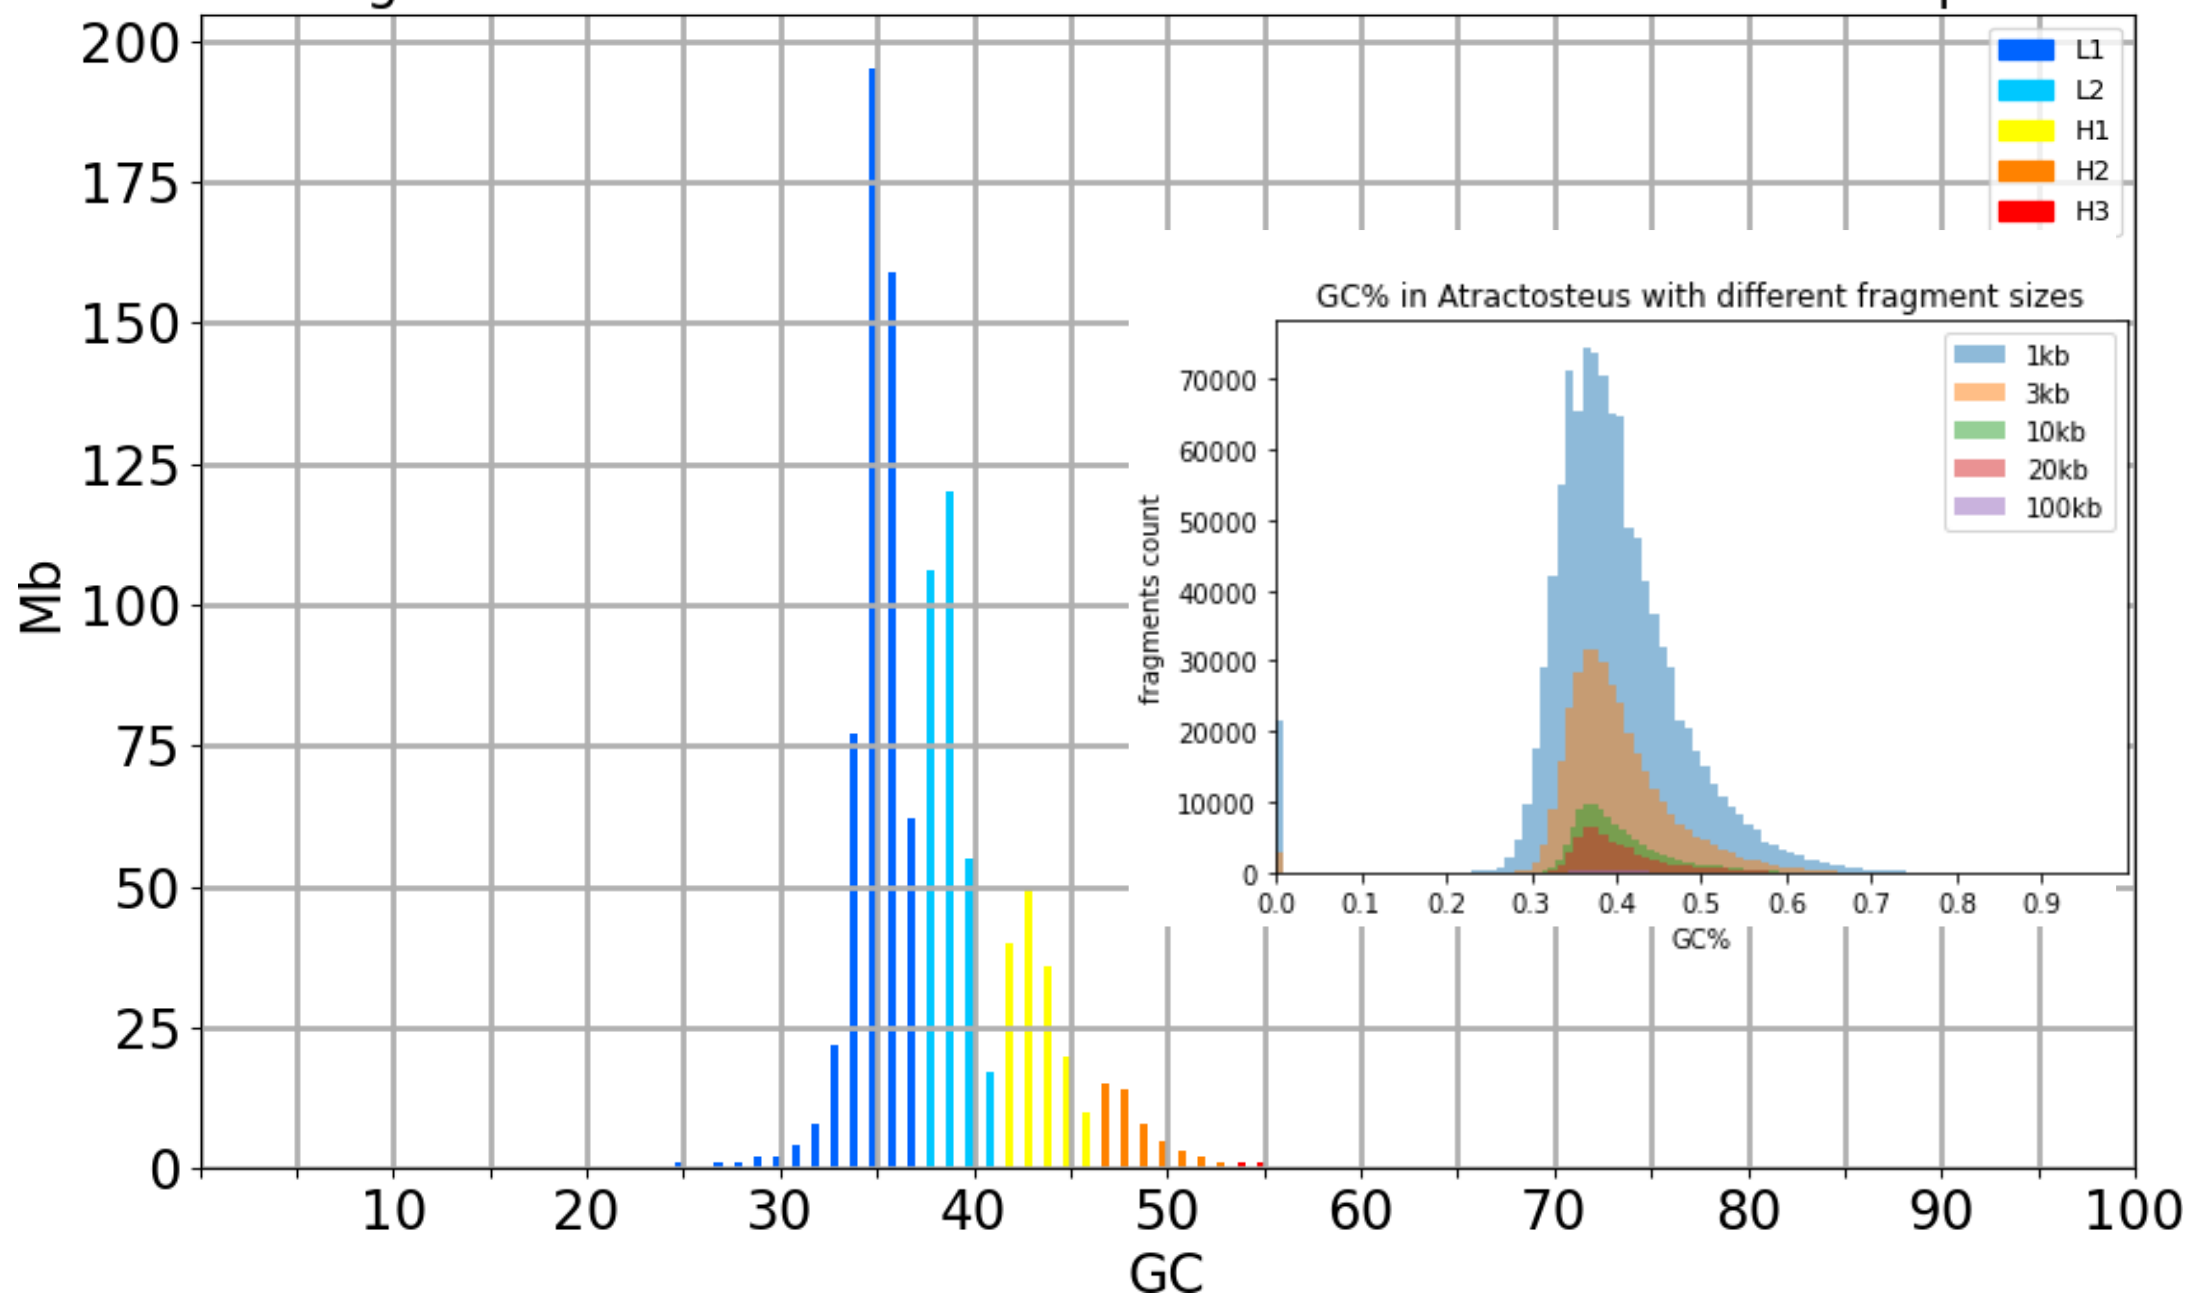

Histogram of isochore families in bins of 1% GC - *Branchiostoma floridae*

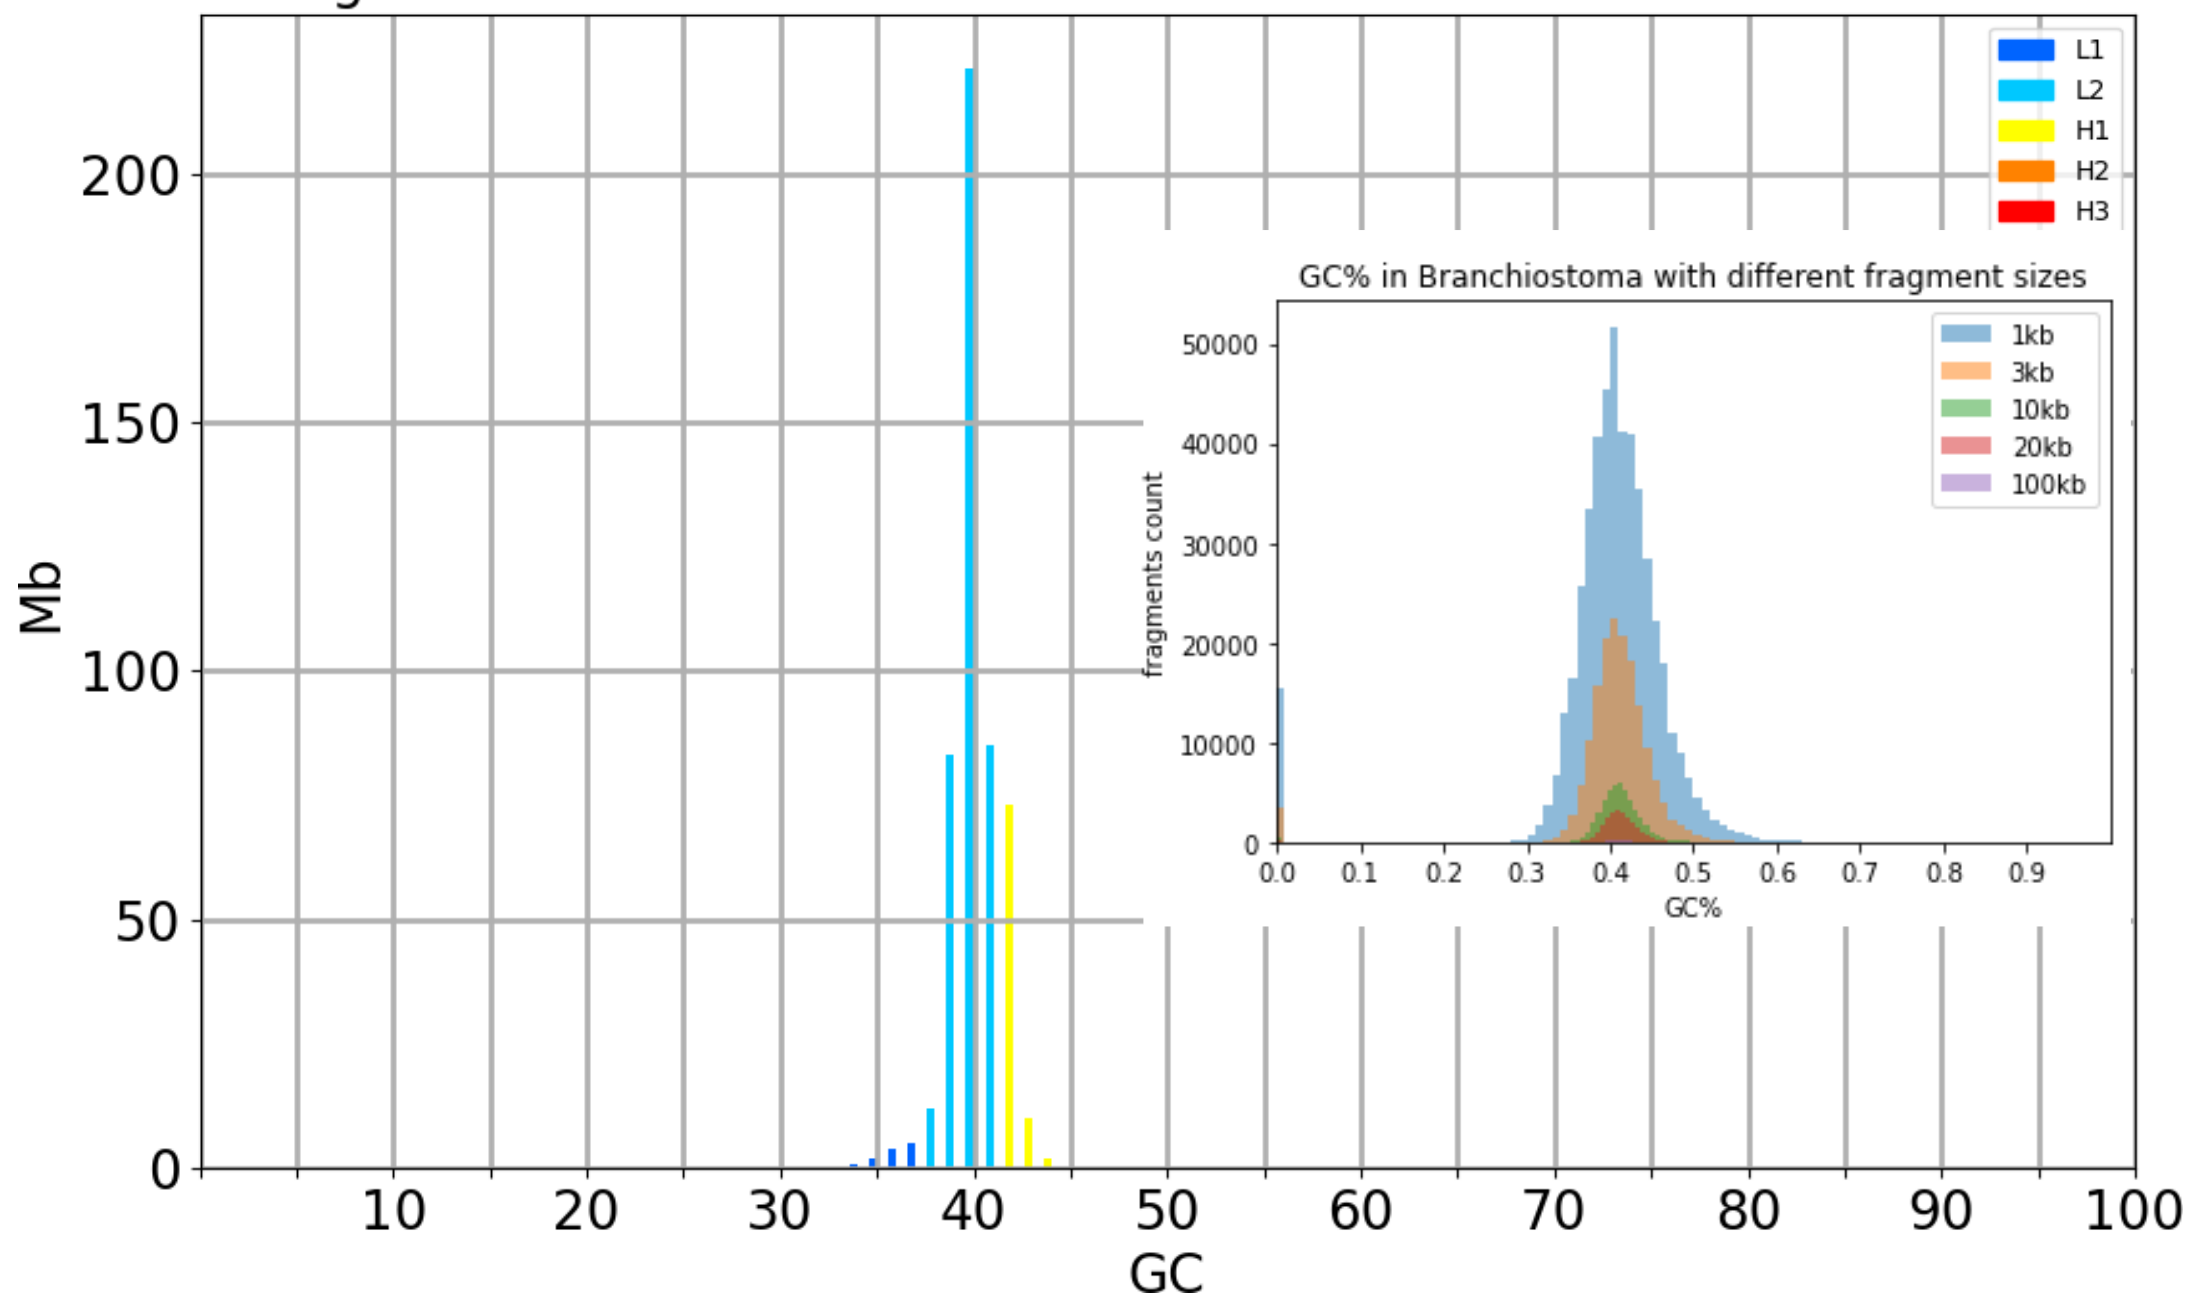

Histogram of isochore families in bins of 1% GC - *Erpetoichthys calabaricus*

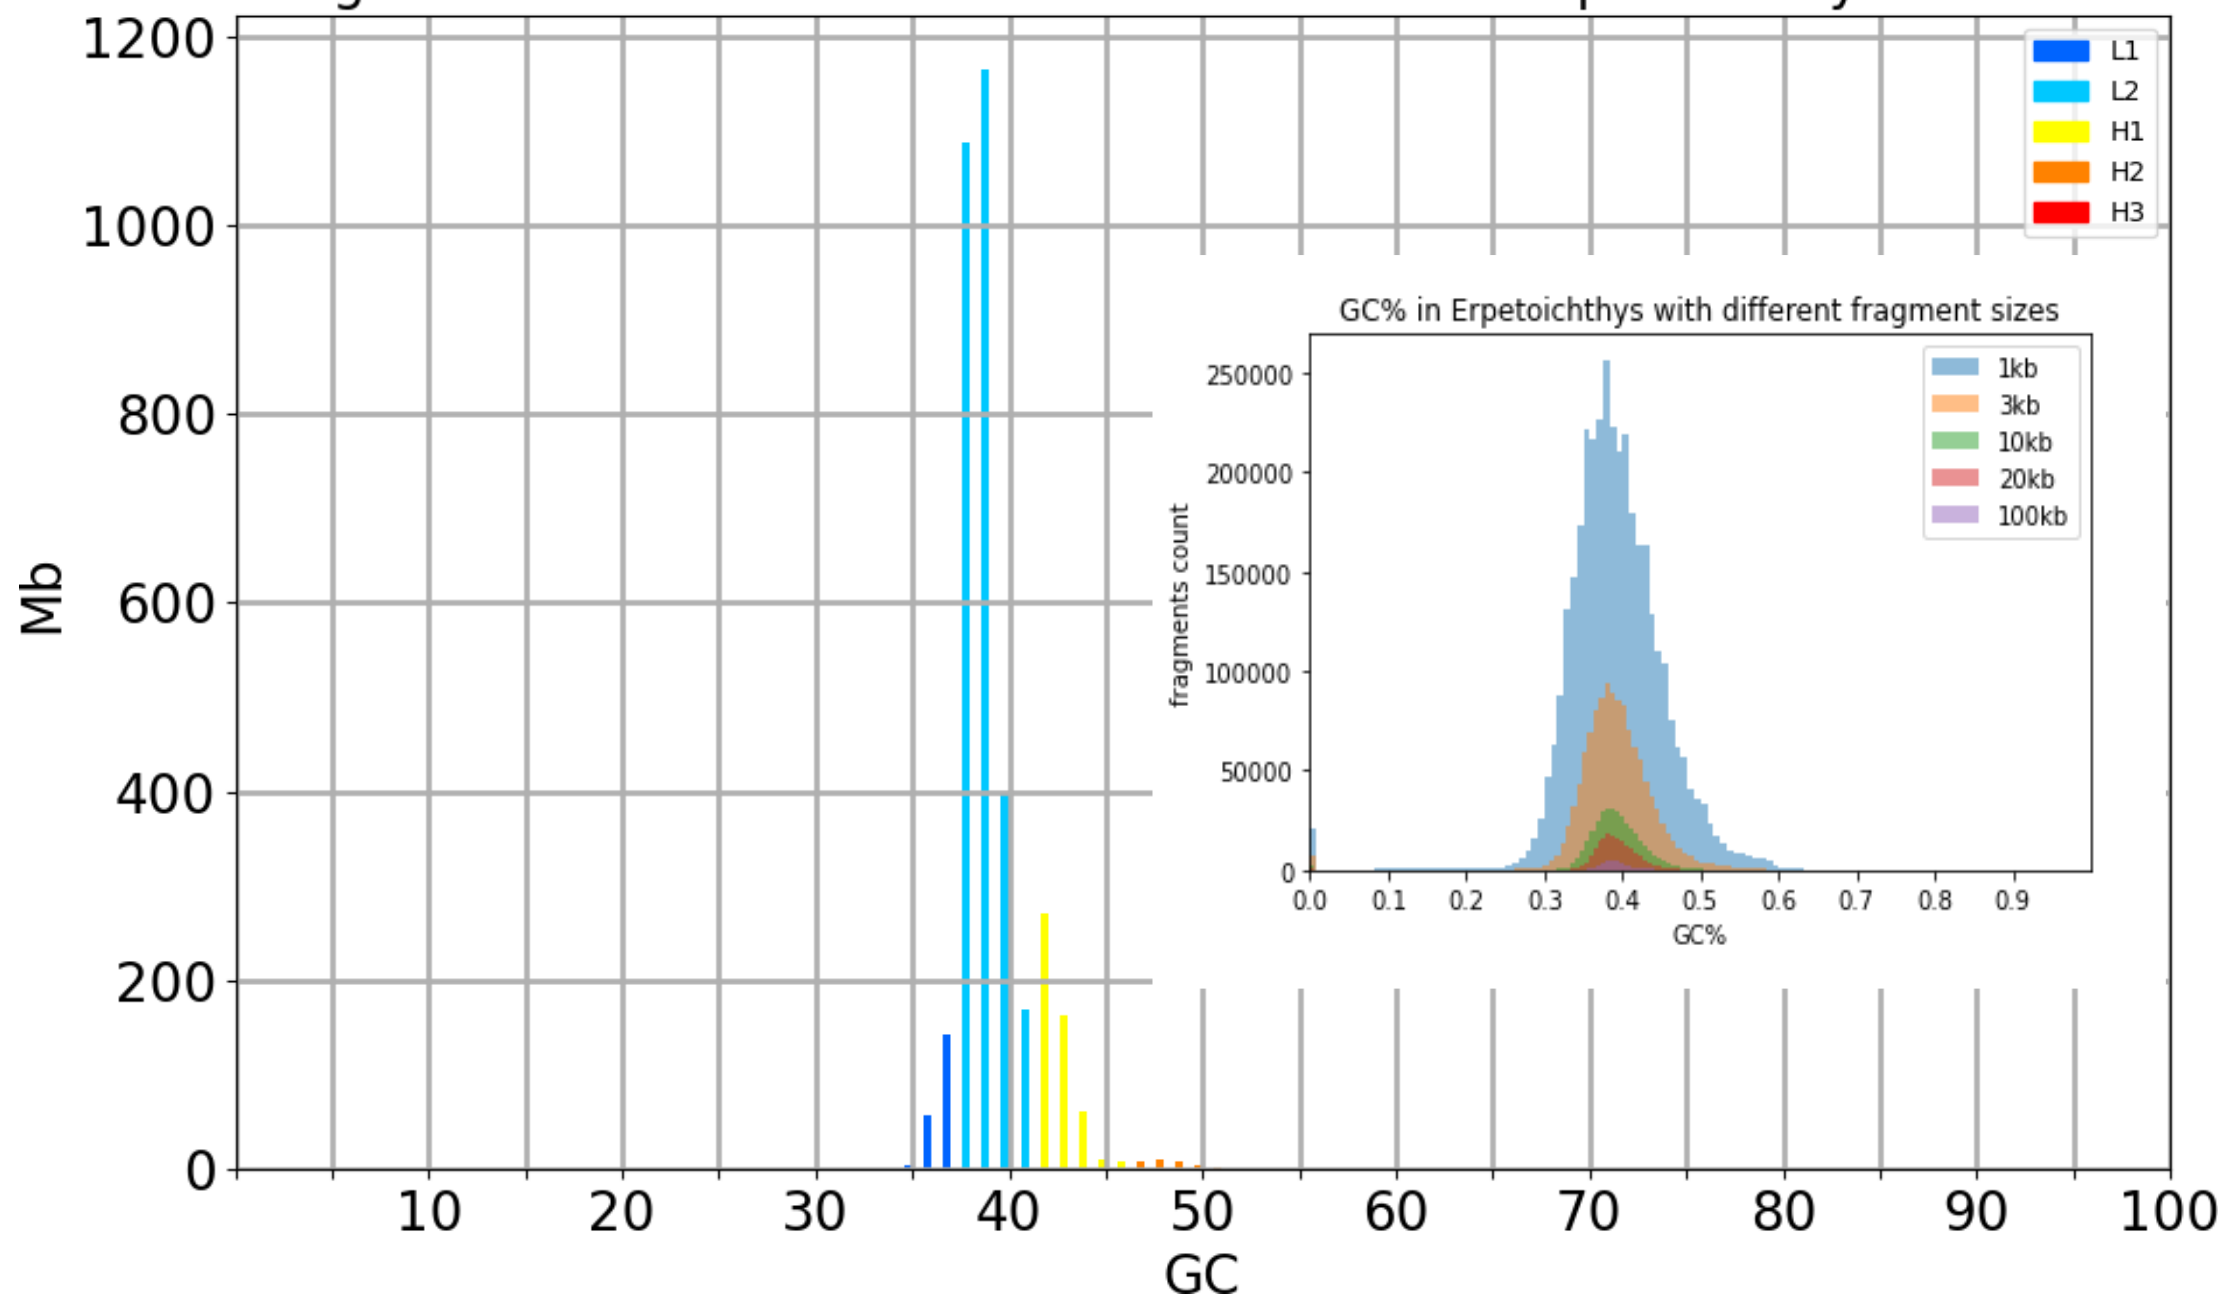

Histogram of isochore families in bins of 1% GC - *Esox lucius*

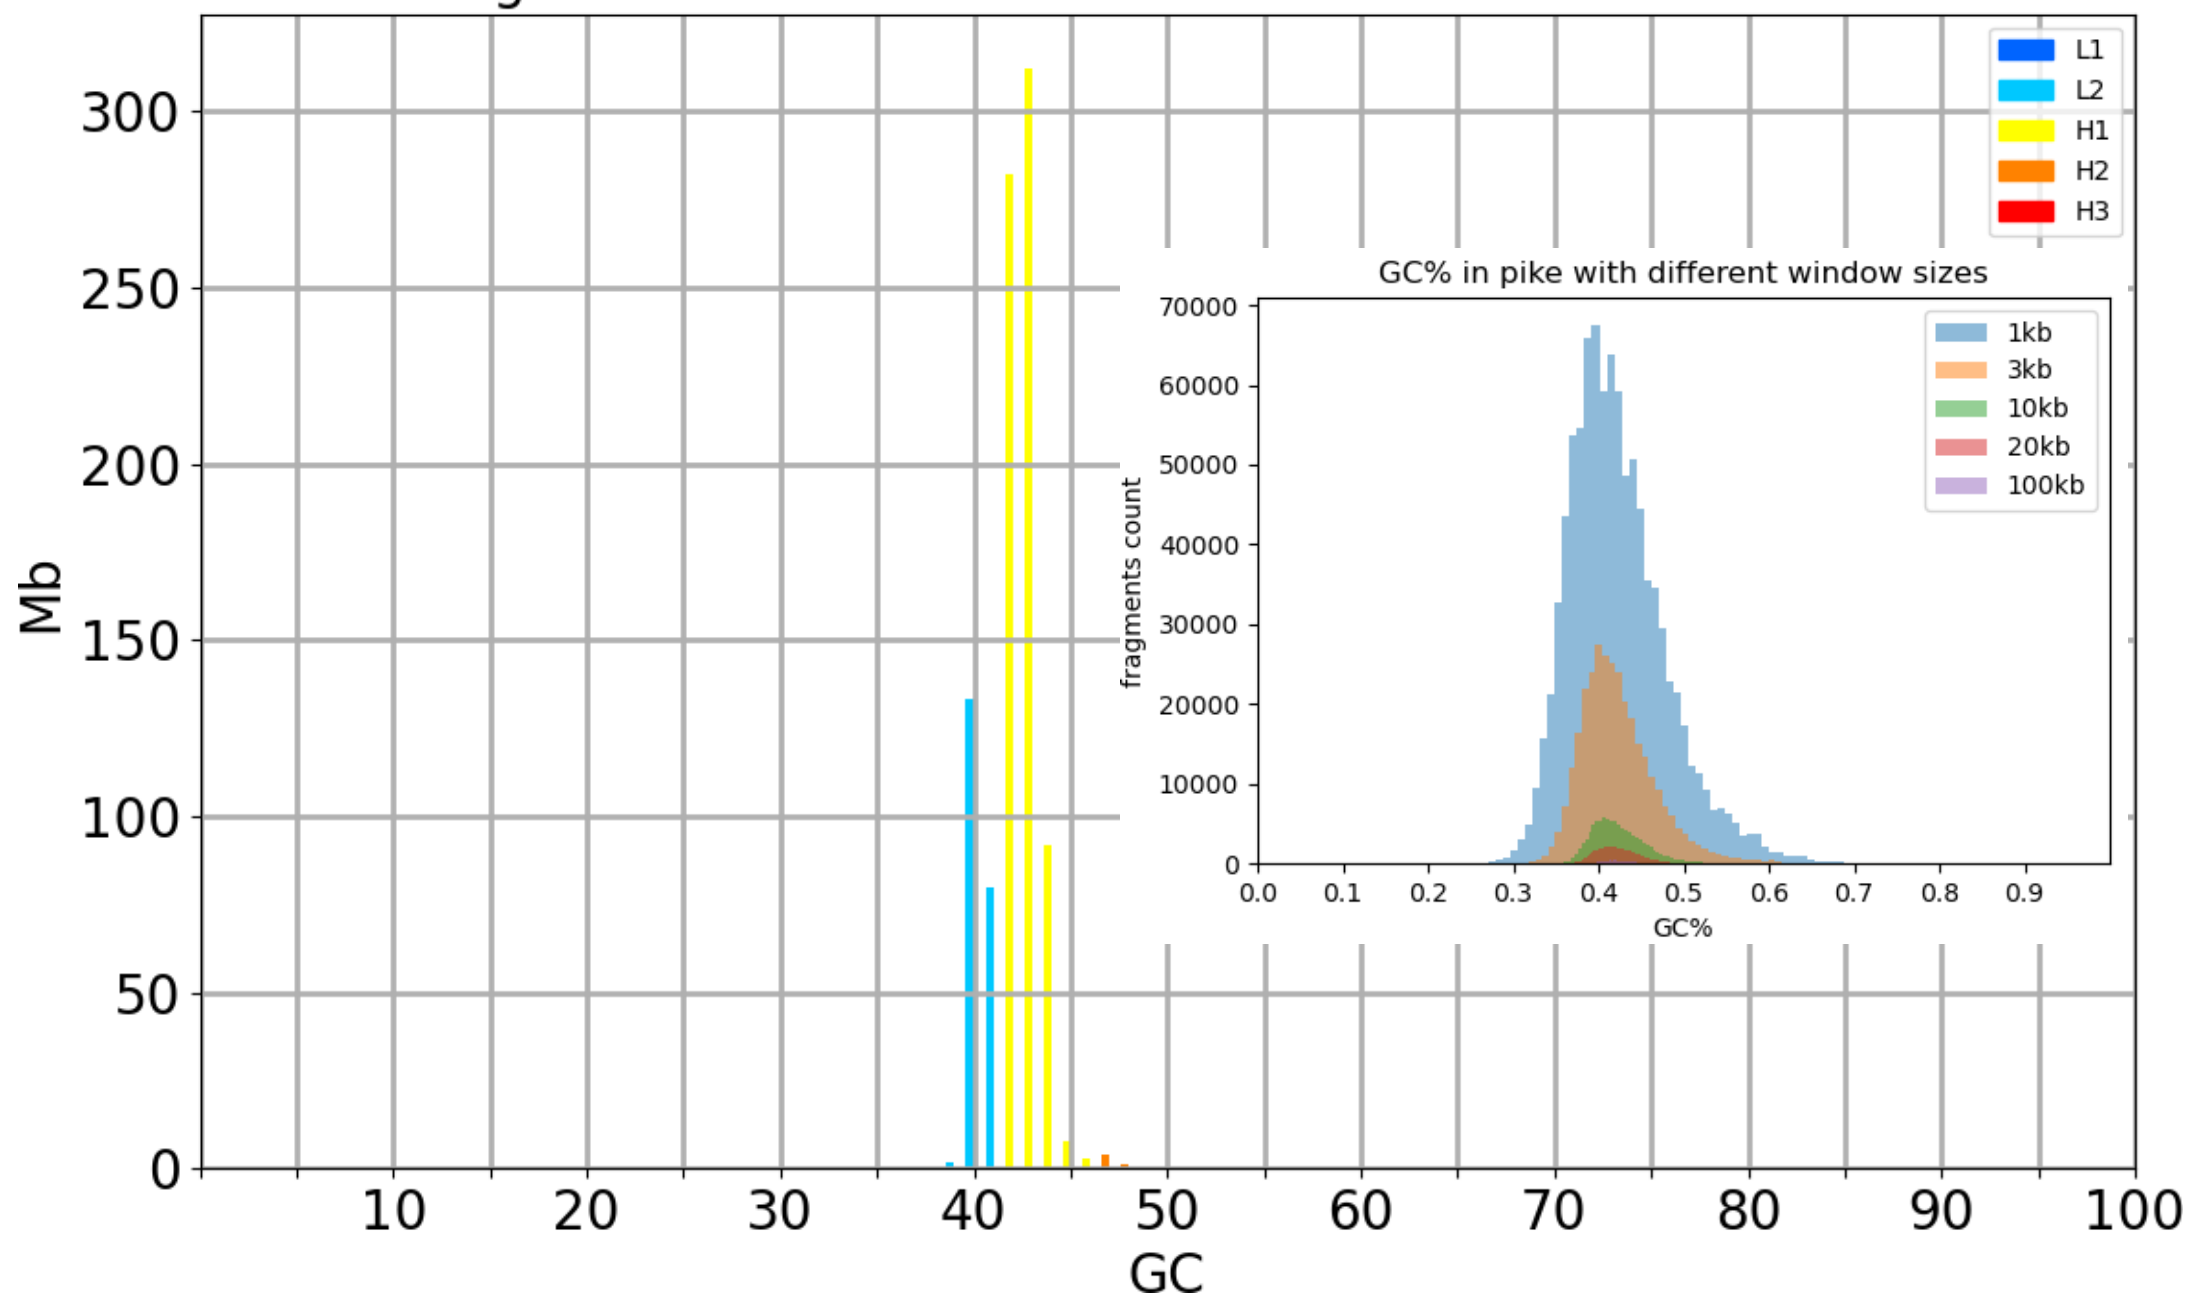



Histogram of isochore families in bins of 1% GC - *Lethenteron reissneri*

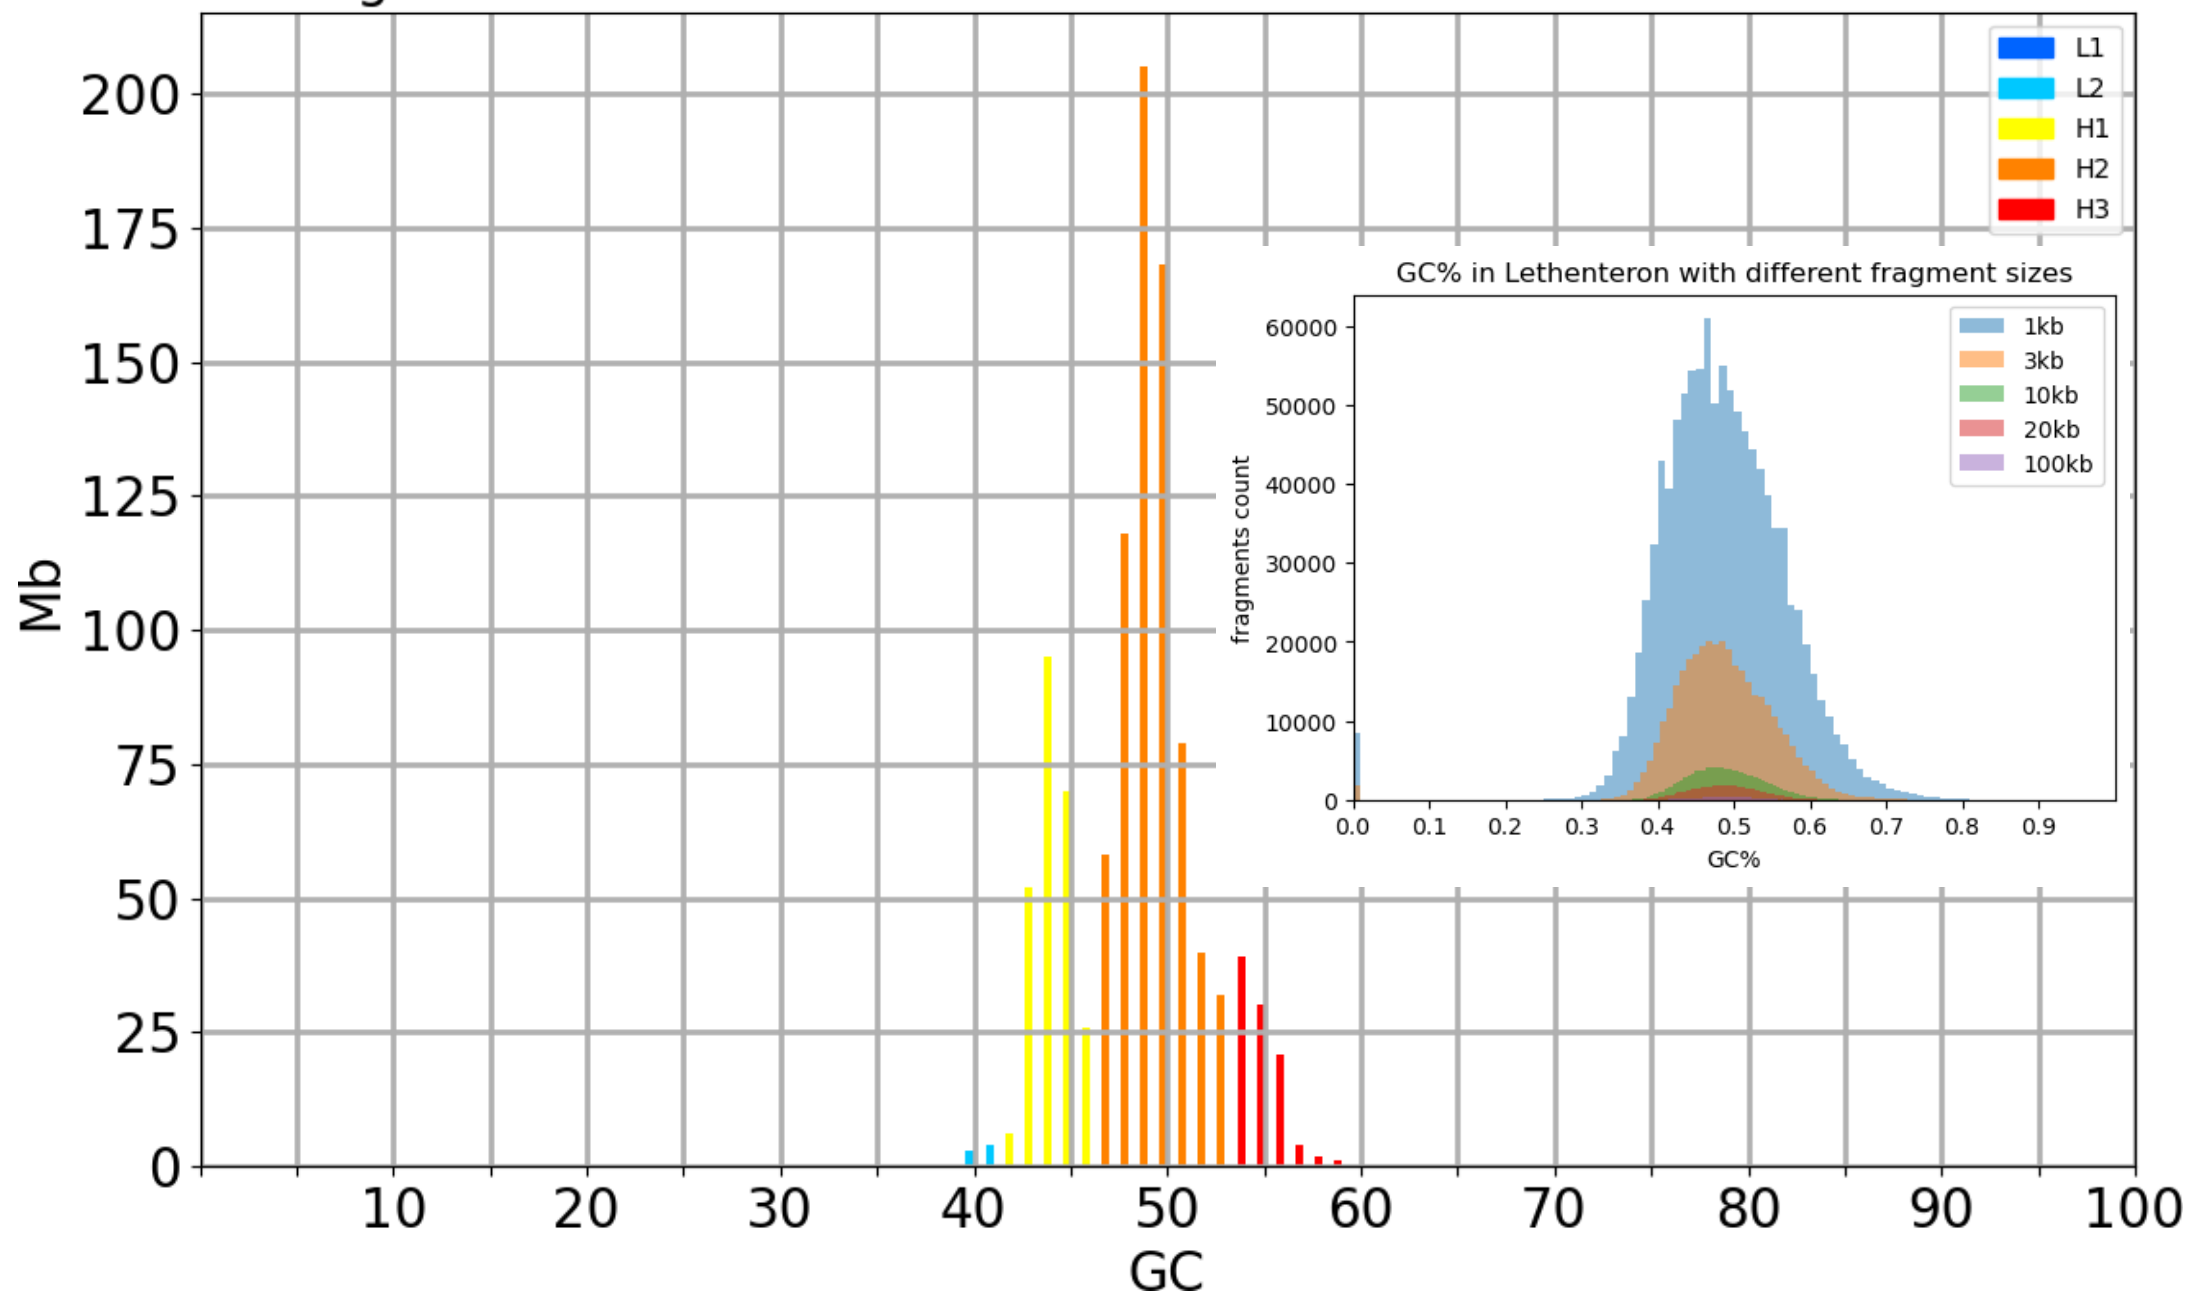

Histogram of isochore families in bins of 1% GC - *Perca fluviatilis*

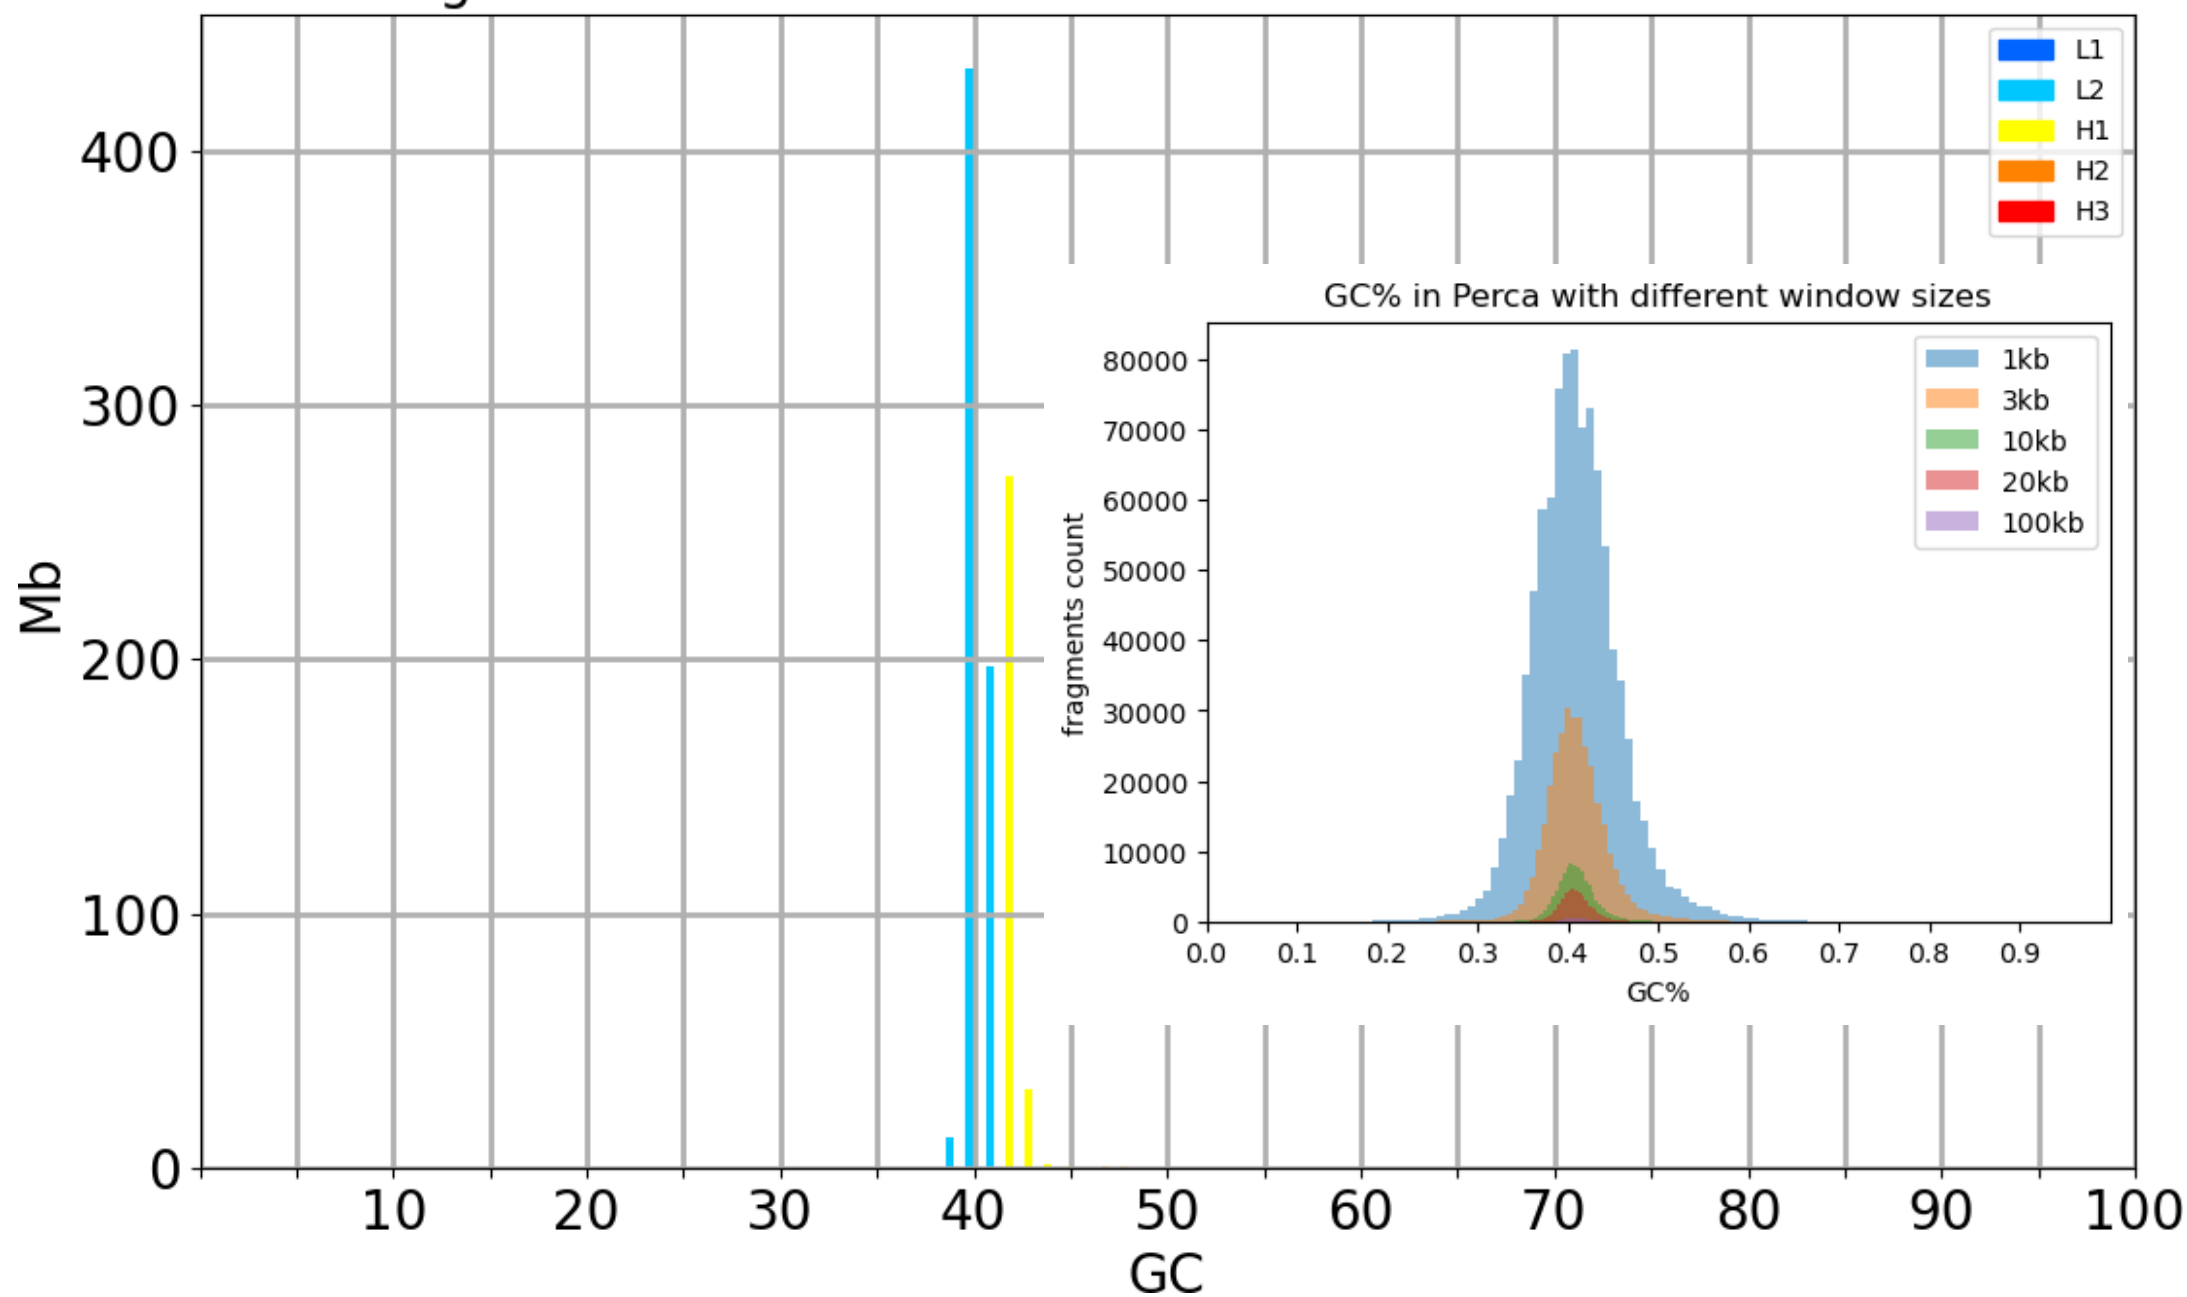

Histogram of isochore families in bins of 1% GC - *Salmo salar*

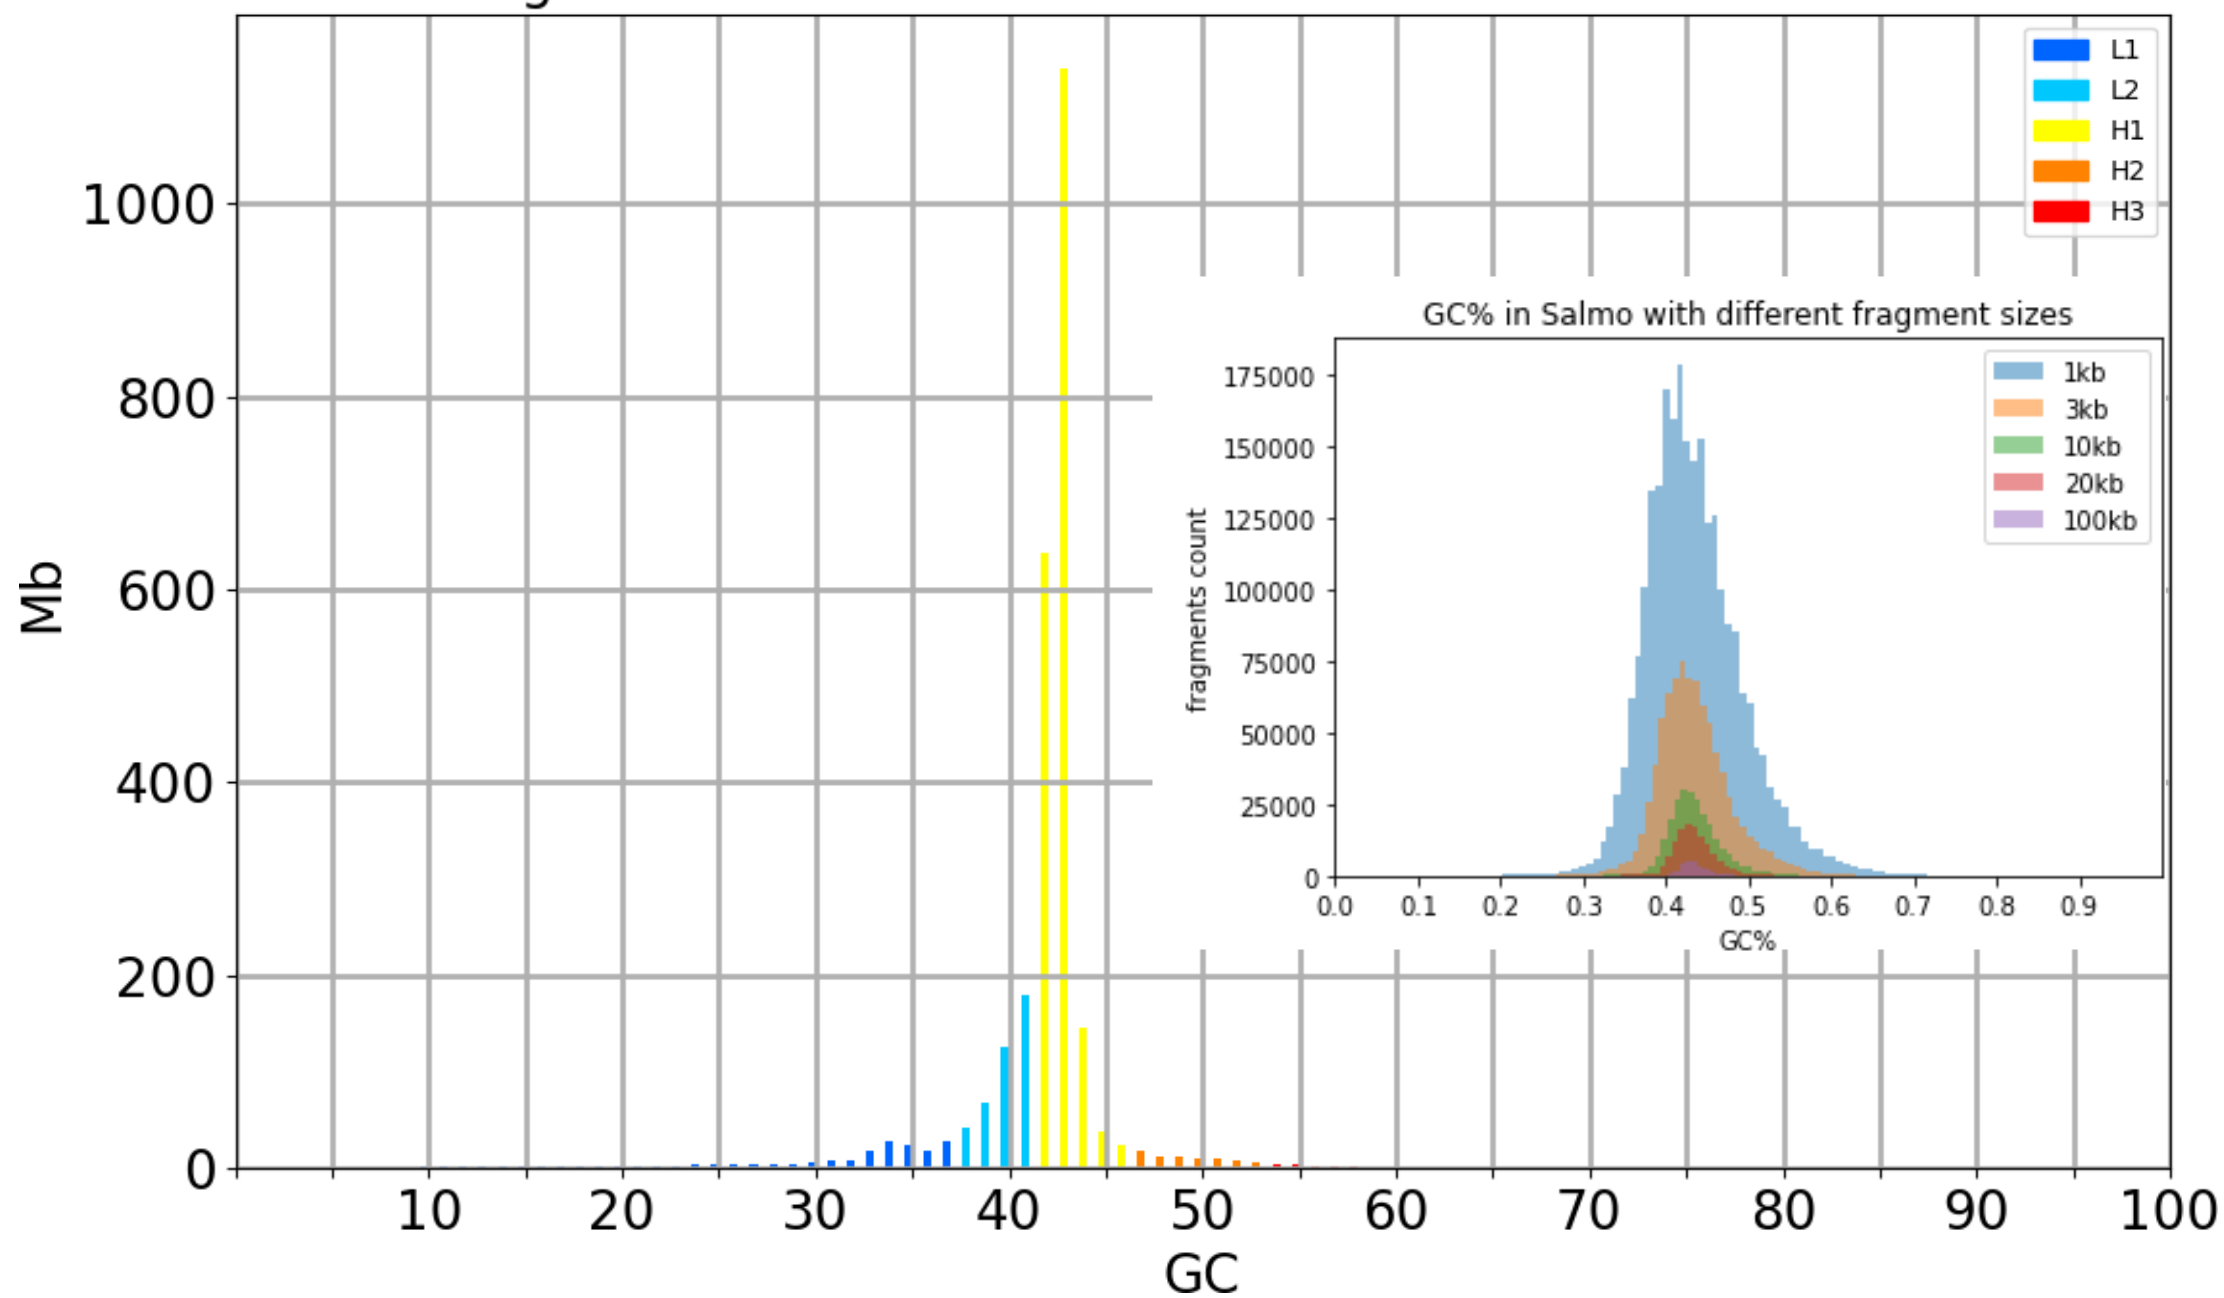

Histogram of isochores families in bins of 1% GC - *Xiphophorus maculatus*

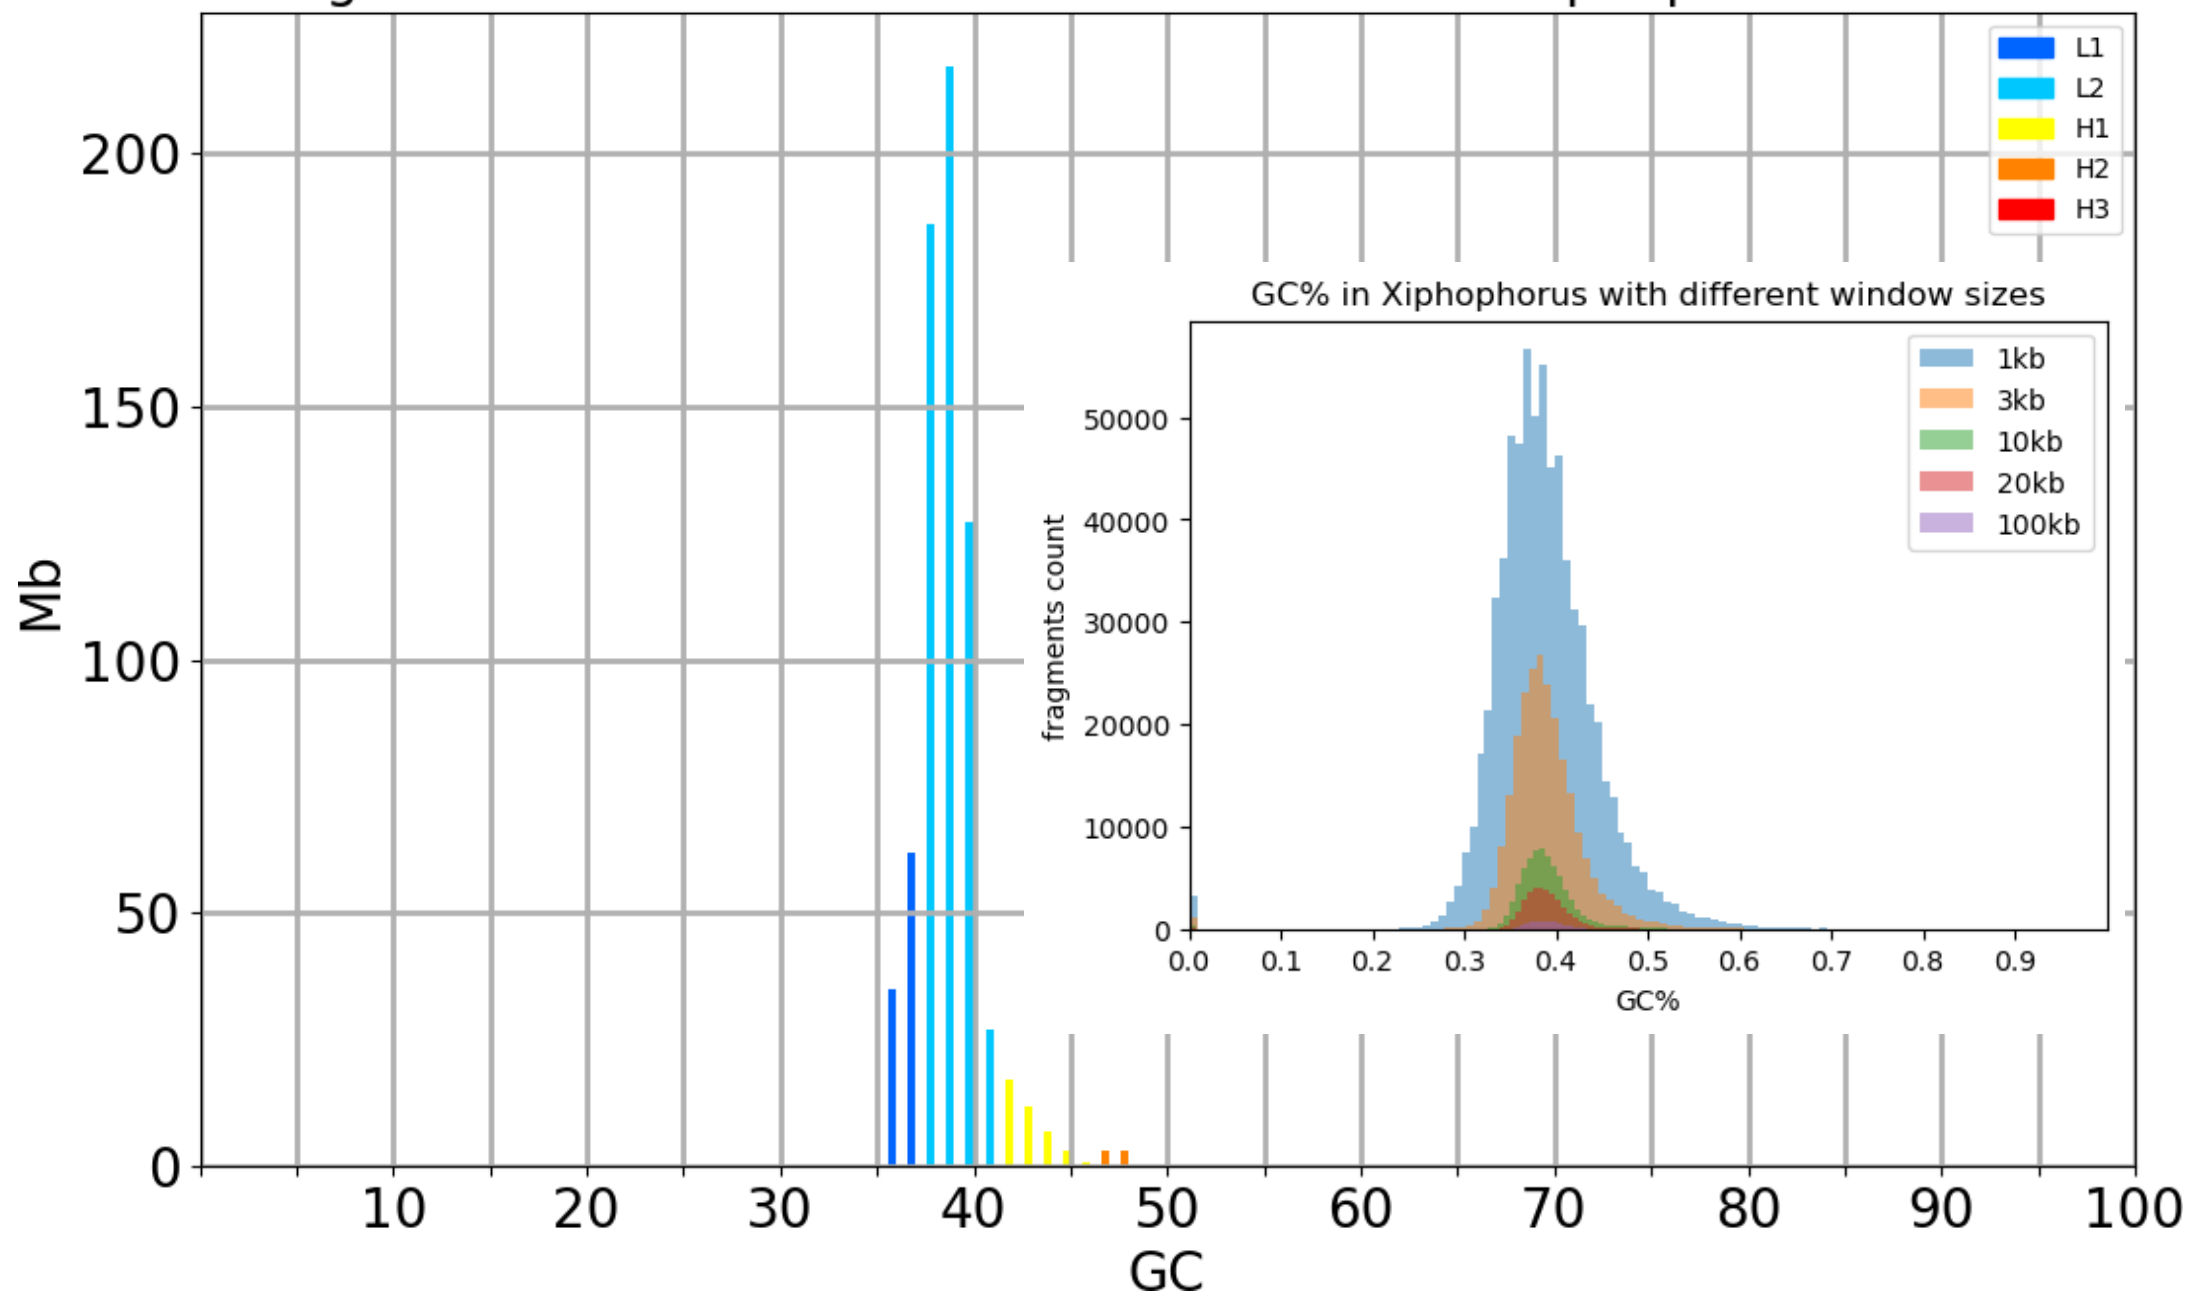

Supplement: s1 [file s1]
